# Supplementary material for: Bayesian network meta-analysis methods for combining individual participant data and aggregate data from single arm trials and randomised controlled trials
Source: PubMed Central journal article supplement (PMC9275254; doi:10.1186/s12874-022-01657-y), 2022-07-11
Supplement: 12874_2022_1657_MOESM1_ESM.pdf [file 12874_2022_1657_MOESM1_ESM.pdf]

Supplementary material for: *Bayesian network  
meta-analysis methods for combining individual  
participant data and aggregate data from single-arm  
trials and randomised controlled trials*

Janharpreet Singh<sup>\*1</sup>, Sandro Gsteiger<sup>2</sup>, Lorna Wheaton<sup>1</sup>, Richard D. Riley<sup>3</sup>,  
Keith R. Abrams<sup>4</sup>, Clare L. Gillies<sup>5</sup>, and Sylwia Bujkiewicz<sup>1</sup>

<sup>1</sup>Biostatistics Research Group, Department of Health Sciences, University of  
Leicester, Leicester, UK

<sup>2</sup>F. Hoffmann-La Roche Ltd, Basel, Switzerland

<sup>3</sup>Centre for Prognosis Research, School of Medicine, Keele University,  
Staffordshire, UK

<sup>4</sup>Department of Statistics, University of Warwick, Coventry, UK

<sup>5</sup>Leicester Real World Evidence Unit, Leicester Diabetes Centre, Leicester, UK

\*Corresponding author: [js929@leicester.ac.uk](mailto:js929@leicester.ac.uk)

## Appendix A - Additional figures

### Baseline response estimates for contrast-based unadjusted methods

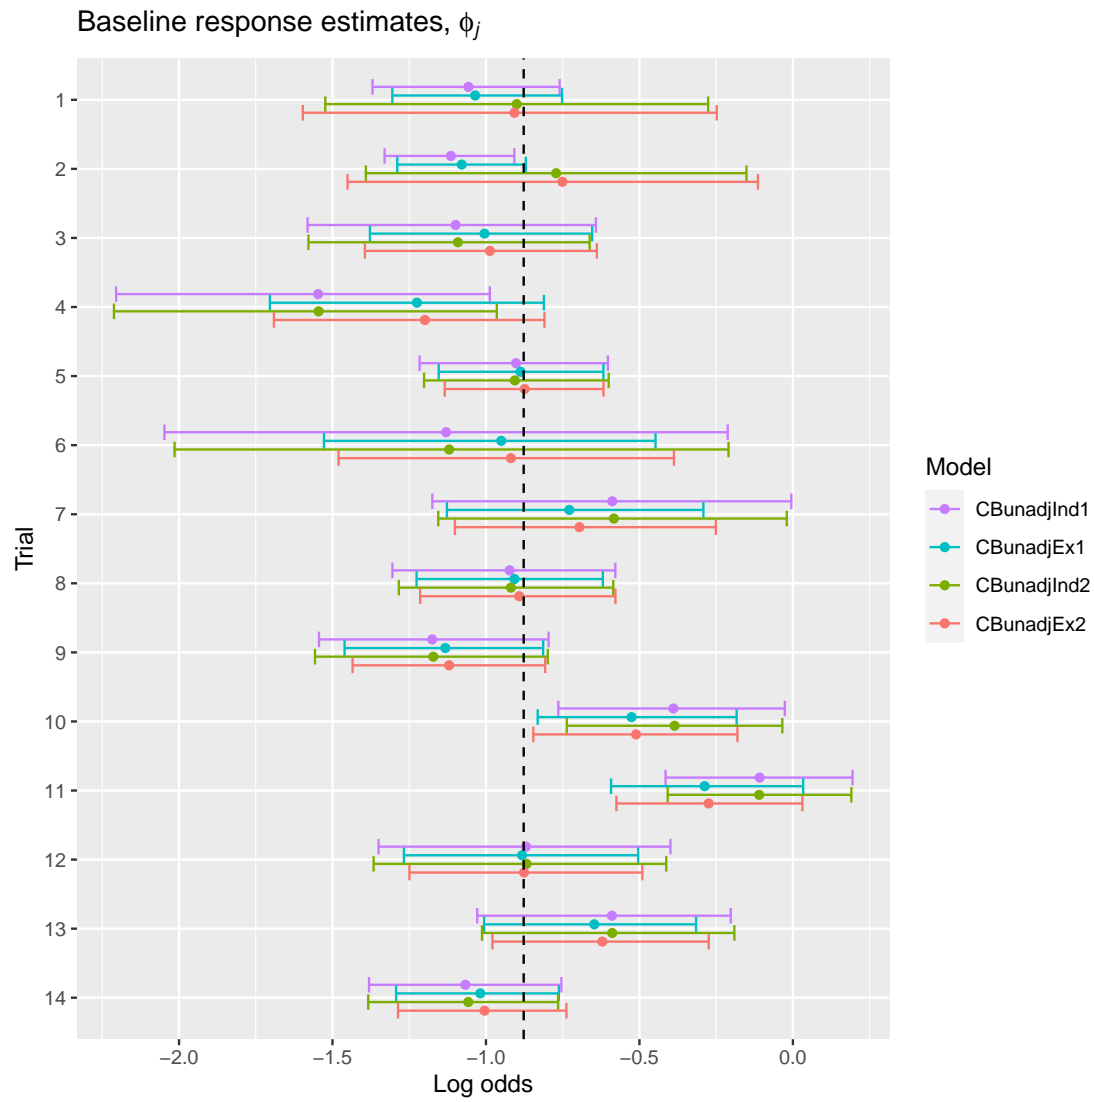

Figure A1: Dashed-line represents mean baseline response  $m_\phi$  from applying *CBunadjEx1*.

## Baseline response estimates for contrast-based methods applied to the artificial dataset

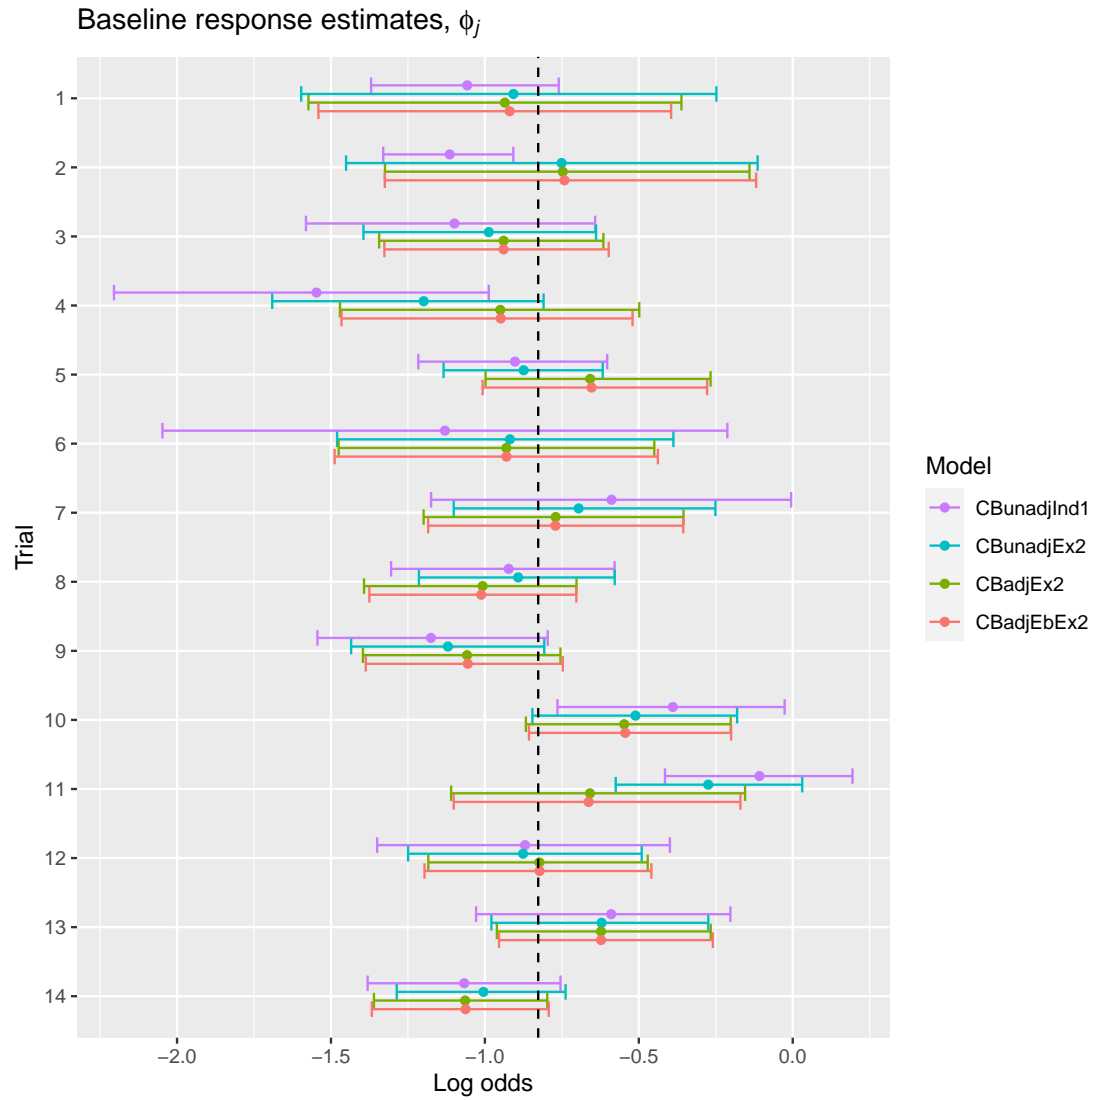

Figure A2: Dashed-line represents mean baseline response  $m_\phi$  from applying *CBunadjEx2*.

## Appendix B - Additional tables

### Parameter estimates for contrast-based unadjusted methods

Table B1: Median and 95% credible interval estimates for model parameters corresponding to the contrast-based unadjusted methods.

| Parameter   | CBunadjInd1          | CBunadjEx1           | CBunadjInd2          | CBunadjEx2           |
|-------------|----------------------|----------------------|----------------------|----------------------|
| $\phi_1$    | -1.06 (-1.37, -0.76) | -1.04 (-1.31, -0.75) | -0.90 (-1.52, -0.28) | -0.91 (-1.60, -0.25) |
| $\phi_2$    | -1.11 (-1.33, -0.91) | -1.08 (-1.29, -0.87) | -0.77 (-1.39, -0.15) | -0.75 (-1.45, -0.11) |
| $\phi_3$    | -1.10 (-1.58, -0.64) | -1.00 (-1.38, -0.65) | -1.09 (-1.58, -0.66) | -0.99 (-1.39, -0.64) |
| $\phi_4$    | -1.55 (-2.20, -0.99) | -1.22 (-1.70, -0.81) | -1.55 (-2.21, -0.96) | -1.20 (-1.69, -0.81) |
| $\phi_5$    | -0.90 (-1.22, -0.60) | -0.89 (-1.15, -0.62) | -0.91 (-1.20, -0.60) | -0.87 (-1.13, -0.62) |
| $\phi_6$    | -1.13 (-2.05, -0.21) | -0.95 (-1.53, -0.45) | -1.12 (-2.01, -0.21) | -0.92 (-1.48, -0.39) |
| $\phi_7$    | -0.59 (-1.17, -0.01) | -0.73 (-1.13, -0.29) | -0.58 (-1.16, -0.02) | -0.70 (-1.10, -0.25) |
| $\phi_8$    | -0.92 (-1.30, -0.58) | -0.91 (-1.23, -0.62) | -0.92 (-1.28, -0.59) | -0.89 (-1.21, -0.58) |
| $\phi_9$    | -1.18 (-1.54, -0.80) | -1.13 (-1.46, -0.81) | -1.17 (-1.56, -0.80) | -1.12 (-1.43, -0.81) |
| $\phi_{10}$ | -0.39 (-0.76, -0.03) | -0.53 (-0.83, -0.18) | -0.39 (-0.74, -0.03) | -0.51 (-0.85, -0.18) |
| $\phi_{11}$ | -0.11 (-0.41, 0.19)  | -0.29 (-0.59, 0.03)  | -0.11 (-0.41, 0.19)  | -0.27 (-0.57, 0.03)  |
| $\phi_{12}$ | -0.87 (-1.35, -0.40) | -0.88 (-1.27, -0.50) | -0.87 (-1.37, -0.41) | -0.88 (-1.25, -0.49) |
| $\phi_{13}$ | -0.59 (-1.03, -0.20) | -0.65 (-1.01, -0.32) | -0.59 (-1.01, -0.19) | -0.62 (-0.98, -0.27) |
| $\phi_{14}$ | -1.07 (-1.38, -0.75) | -1.02 (-1.29, -0.76) | -1.06 (-1.38, -0.77) | -1.00 (-1.29, -0.74) |
| $d_1$       | 0.00 ( 0.00, 0.00)   | 0.00 ( 0.00, 0.00)   | 0.00 ( 0.00, 0.00)   | 0.00 ( 0.00, 0.00)   |
| $d_2$       | 1.38 ( 0.67, 2.07)   | 1.35 ( 0.78, 1.92)   | 1.12 ( 0.27, 1.98)   | 1.12 ( 0.33, 1.92)   |
| $d_3$       | 1.04 ( 0.41, 1.67)   | 1.06 ( 0.54, 1.56)   | 1.04 ( 0.37, 1.70)   | 1.06 ( 0.52, 1.56)   |
| $d_4$       | 1.59 ( 0.87, 2.31)   | 1.43 ( 0.90, 1.95)   | 1.59 ( 0.90, 2.29)   | 1.41 ( 0.85, 1.97)   |
| $d_5$       | 1.13 ( 0.68, 1.58)   | 1.19 ( 0.83, 1.54)   | 1.13 ( 0.68, 1.60)   | 1.16 ( 0.81, 1.52)   |
| $\sigma$    | 0.42 ( 0.20, 0.81)   | 0.32 ( 0.14, 0.64)   | 0.42 ( 0.19, 0.84)   | 0.32 ( 0.10, 0.70)   |

## Parameter estimates for arm-based unadjusted methods

Table B2: Median and 95% credible interval estimates for model parameters corresponding to the arm-based unadjusted models.

| Parameter  | ABunadj1             | ABunadj2             |
|------------|----------------------|----------------------|
| $\theta_1$ | -0.87 (-1.09, -0.66) | -0.83 (-1.08, -0.58) |
| $\theta_2$ | 0.34 (-0.16, 0.80)   | 0.28 (-0.26, 0.82)   |
| $\theta_3$ | 0.24 (-0.21, 0.67)   | 0.25 (-0.19, 0.69)   |
| $\theta_4$ | 0.44 (-0.03, 0.89)   | 0.46 (-0.04, 0.91)   |
| $\theta_5$ | 0.37 ( 0.05, 0.67)   | 0.36 ( 0.05, 0.70)   |
| $\nu_1$    | -0.13 (-0.48, 0.19)  | -0.14 (-0.68, 0.39)  |
| $\nu_2$    | -0.20 (-0.66, 0.29)  | 0.15 (-0.39, 0.71)   |
| $\nu_3$    | 0.09 (-0.37, 0.60)   | 0.04 (-0.42, 0.49)   |
| $\nu_4$    | -0.22 (-0.52, 0.06)  | -0.23 (-0.68, 0.20)  |
| $\nu_5$    | 0.04 (-0.39, 0.51)   | -0.05 (-0.53, 0.44)  |
| $\nu_6$    | -0.20 (-0.64, 0.19)  | -0.46 (-0.99, -0.01) |
| $\nu_7$    | -0.04 (-0.50, 0.45)  | 0.03 (-0.42, 0.53)   |
| $\nu_8$    | -0.43 (-0.97, 0.03)  | -0.04 (-0.38, 0.31)  |
| $\nu_9$    | 0.04 (-0.41, 0.53)   | -0.14 (-0.70, 0.41)  |
| $\nu_{10}$ | 0.00 (-0.33, 0.33)   | 0.00 (-0.63, 0.60)   |
| $\nu_{11}$ | -0.12 (-0.66, 0.39)  | 0.08 (-0.32, 0.49)   |
| $\nu_{12}$ | 0.01 (-0.58, 0.58)   | 0.15 (-0.34, 0.66)   |
| $\nu_{13}$ | 0.08 (-0.32, 0.49)   | 0.02 (-0.38, 0.38)   |
| $\nu_{14}$ | 0.16 (-0.33, 0.68)   | -0.08 (-0.47, 0.29)  |
| $\nu_{15}$ | 0.02 (-0.35, 0.37)   | -0.54 (-0.93, -0.19) |
| $\nu_{16}$ | -0.06 (-0.43, 0.32)  | -0.25 (-0.64, 0.15)  |
| $\nu_{17}$ | -0.54 (-0.90, -0.19) | 0.13 (-0.33, 0.59)   |
| $\nu_{18}$ | -0.21 (-0.60, 0.18)  | 0.36 ( 0.00, 0.77)   |
| $\nu_{19}$ | 0.14 (-0.32, 0.60)   | 0.13 (-0.26, 0.50)   |
| $\nu_{20}$ | 0.40 ( 0.03, 0.78)   | 0.64 ( 0.30, 1.03)   |
| $\nu_{21}$ | 0.12 (-0.25, 0.49)   | -0.13 (-0.67, 0.34)  |
| $\nu_{22}$ | 0.67 ( 0.34, 1.04)   | -0.01 (-0.44, 0.42)  |
| $\nu_{23}$ | -0.13 (-0.62, 0.34)  | 0.49 ( 0.11, 0.90)   |
| $\nu_{24}$ | 0.01 (-0.41, 0.43)   | 0.13 (-0.30, 0.56)   |
| $\nu_{25}$ | 0.48 ( 0.10, 0.90)   | -0.03 (-0.38, 0.32)  |
| $\nu_{26}$ | 0.15 (-0.26, 0.56)   | -0.21 (-0.58, 0.13)  |
| $\nu_{27}$ | -0.03 (-0.37, 0.33)  |                      |
| $\nu_{28}$ | -0.18 (-0.51, 0.14)  |                      |
| $\tau$     | 0.34 ( 0.22, 0.53)   | 0.35 ( 0.23, 0.55)   |
| $\rho$     | 0.29 (-0.42, 0.80)   | 0.31 (-0.40, 0.82)   |

## Parameter estimates for contrast-based methods applied to the artificial dataset

Table B3: Median and 95% credible interval estimates for model parameters corresponding to the contrast-based unadjusted and adjusted methods.

| Parameter     | CBunadjEx2           | CBadjEx2             | CBadjEbEx2           |
|---------------|----------------------|----------------------|----------------------|
| $m_\phi$      | -0.83 (-1.08, -0.59) | -0.84 (-1.07, -0.62) | -0.83 (-1.06, -0.62) |
| $\sigma_\phi$ | 0.33 ( 0.18, 0.60)   | 0.28 ( 0.12, 0.56)   | 0.27 ( 0.12, 0.56)   |
| $\phi_1$      | -0.91 (-1.60, -0.25) | -0.94 (-1.57, -0.36) | -0.92 (-1.54, -0.39) |
| $\phi_2$      | -0.75 (-1.45, -0.11) | -0.75 (-1.32, -0.14) | -0.74 (-1.33, -0.12) |
| $\phi_3$      | -0.99 (-1.39, -0.64) | -0.94 (-1.34, -0.62) | -0.94 (-1.33, -0.60) |
| $\phi_4$      | -1.20 (-1.69, -0.81) | -0.95 (-1.47, -0.50) | -0.95 (-1.47, -0.52) |
| $\phi_5$      | -0.87 (-1.13, -0.62) | -0.66 (-1.00, -0.27) | -0.65 (-1.01, -0.28) |
| $\phi_6$      | -0.92 (-1.48, -0.39) | -0.93 (-1.47, -0.45) | -0.93 (-1.49, -0.44) |
| $\phi_7$      | -0.70 (-1.10, -0.25) | -0.77 (-1.20, -0.35) | -0.77 (-1.18, -0.36) |
| $\phi_8$      | -0.89 (-1.21, -0.58) | -1.01 (-1.39, -0.70) | -1.01 (-1.38, -0.70) |
| $\phi_9$      | -1.12 (-1.43, -0.81) | -1.06 (-1.40, -0.75) | -1.06 (-1.39, -0.75) |
| $\phi_{10}$   | -0.51 (-0.85, -0.18) | -0.55 (-0.87, -0.20) | -0.54 (-0.86, -0.20) |
| $\phi_{11}$   | -0.27 (-0.57, 0.03)  | -0.66 (-1.11, -0.15) | -0.66 (-1.10, -0.17) |
| $\phi_{12}$   | -0.88 (-1.25, -0.49) | -0.82 (-1.18, -0.47) | -0.82 (-1.20, -0.46) |
| $\phi_{13}$   | -0.62 (-0.98, -0.27) | -0.62 (-0.96, -0.27) | -0.62 (-0.95, -0.26) |
| $\phi_{14}$   | -1.00 (-1.29, -0.74) | -1.06 (-1.36, -0.80) | -1.06 (-1.37, -0.79) |
| $d_1$         | 0.00 ( 0.00, 0.00)   | 0.00 ( 0.00, 0.00)   | 0.00 ( 0.00, 0.00)   |
| $d_2$         | 1.12 ( 0.33, 1.92)   | 1.10 ( 0.35, 1.86)   | 1.08 ( 0.29, 1.84)   |
| $d_3$         | 1.06 ( 0.52, 1.56)   | 1.07 ( 0.50, 1.62)   | 1.06 ( 0.53, 1.65)   |
| $d_4$         | 1.41 ( 0.85, 1.97)   | 1.48 ( 0.93, 2.08)   | 1.49 ( 0.92, 2.08)   |
| $d_5$         | 1.16 ( 0.81, 1.52)   | 1.13 ( 0.73, 1.52)   | 1.12 ( 0.72, 1.55)   |
| $\sigma$      | 0.32 ( 0.10, 0.70)   | 0.36 ( 0.16, 0.73)   | 0.37 ( 0.16, 0.75)   |
| $\alpha^A$    |                      | -0.10 (-0.20, 0.00)  | -0.10 (-0.21, 0.00)  |
| $\alpha^W$    |                      |                      | 0.00 (-0.02, 0.01)   |

## Parameter estimates for arm-based methods applied to the artificial dataset

Table B4: Median and 95% credible interval estimates for model parameters corresponding to the arm-based unadjusted and adjusted models.

| Parameter  | ABunadj2             | ABadj2               | ABadjEb2             |
|------------|----------------------|----------------------|----------------------|
| $\theta_1$ | -0.83 (-1.08, -0.58) | -0.85 (-1.09, -0.61) | -0.85 (-1.09, -0.60) |
| $\theta_2$ | 0.28 (-0.26, 0.82)   | 0.27 (-0.24, 0.80)   | 0.26 (-0.29, 0.78)   |
| $\theta_3$ | 0.25 (-0.19, 0.69)   | 0.26 (-0.17, 0.69)   | 0.27 (-0.17, 0.69)   |
| $\theta_4$ | 0.46 (-0.04, 0.91)   | 0.59 ( 0.10, 1.07)   | 0.60 ( 0.10, 1.07)   |
| $\theta_5$ | 0.36 ( 0.05, 0.70)   | 0.32 ( 0.02, 0.63)   | 0.32 ( 0.01, 0.65)   |
| $\nu_1$    | -0.14 (-0.68, 0.39)  | -0.22 (-0.76, 0.31)  | -0.22 (-0.77, 0.33)  |
| $\nu_2$    | 0.15 (-0.39, 0.71)   | 0.21 (-0.32, 0.72)   | 0.22 (-0.30, 0.77)   |
| $\nu_3$    | 0.04 (-0.42, 0.49)   | 0.04 (-0.39, 0.48)   | 0.04 (-0.37, 0.49)   |
| $\nu_4$    | -0.23 (-0.68, 0.20)  | -0.18 (-0.60, 0.22)  | -0.18 (-0.64, 0.24)  |
| $\nu_5$    | -0.05 (-0.53, 0.44)  | 0.09 (-0.41, 0.62)   | 0.08 (-0.40, 0.58)   |
| $\nu_6$    | -0.46 (-0.99, -0.01) | -0.31 (-0.90, 0.15)  | -0.32 (-0.91, 0.19)  |
| $\nu_7$    | 0.03 (-0.42, 0.53)   | 0.09 (-0.38, 0.57)   | 0.08 (-0.37, 0.53)   |
| $\nu_8$    | -0.04 (-0.38, 0.31)  | 0.12 (-0.26, 0.51)   | 0.12 (-0.29, 0.56)   |
| $\nu_9$    | -0.14 (-0.70, 0.41)  | -0.23 (-0.81, 0.32)  | -0.24 (-0.85, 0.27)  |
| $\nu_{10}$ | 0.00 (-0.63, 0.60)   | -0.02 (-0.62, 0.60)  | -0.01 (-0.62, 0.60)  |
| $\nu_{11}$ | 0.08 (-0.32, 0.49)   | 0.11 (-0.27, 0.53)   | 0.12 (-0.27, 0.51)   |
| $\nu_{12}$ | 0.15 (-0.34, 0.66)   | 0.09 (-0.40, 0.57)   | 0.09 (-0.39, 0.59)   |
| $\nu_{13}$ | 0.02 (-0.38, 0.38)   | -0.07 (-0.46, 0.31)  | -0.07 (-0.44, 0.31)  |
| $\nu_{14}$ | -0.08 (-0.47, 0.29)  | -0.14 (-0.54, 0.25)  | -0.14 (-0.54, 0.22)  |
| $\nu_{15}$ | -0.54 (-0.93, -0.19) | -0.45 (-0.85, -0.10) | -0.45 (-0.86, -0.09) |
| $\nu_{16}$ | -0.25 (-0.64, 0.15)  | -0.24 (-0.63, 0.14)  | -0.24 (-0.63, 0.13)  |
| $\nu_{17}$ | 0.13 (-0.33, 0.59)   | 0.09 (-0.38, 0.54)   | 0.08 (-0.36, 0.54)   |
| $\nu_{18}$ | 0.36 ( 0.00, 0.77)   | 0.39 ( 0.02, 0.78)   | 0.38 ( 0.00, 0.79)   |
| $\nu_{19}$ | 0.13 (-0.26, 0.50)   | -0.09 (-0.52, 0.37)  | -0.08 (-0.54, 0.35)  |
| $\nu_{20}$ | 0.64 ( 0.30, 1.03)   | 0.39 (-0.07, 0.89)   | 0.39 (-0.06, 0.90)   |
| $\nu_{21}$ | -0.13 (-0.67, 0.34)  | -0.06 (-0.58, 0.40)  | -0.08 (-0.56, 0.41)  |
| $\nu_{22}$ | -0.01 (-0.44, 0.42)  | -0.01 (-0.43, 0.39)  | -0.01 (-0.43, 0.40)  |
| $\nu_{23}$ | 0.49 ( 0.11, 0.90)   | 0.54 ( 0.16, 0.95)   | 0.54 ( 0.17, 0.96)   |
| $\nu_{24}$ | 0.13 (-0.30, 0.56)   | 0.16 (-0.27, 0.57)   | 0.16 (-0.27, 0.59)   |
| $\nu_{25}$ | -0.03 (-0.38, 0.32)  | -0.04 (-0.38, 0.29)  | -0.04 (-0.39, 0.29)  |
| $\nu_{26}$ | -0.21 (-0.58, 0.13)  | -0.25 (-0.59, 0.09)  | -0.24 (-0.60, 0.08)  |
| $\tau$     | 0.35 ( 0.23, 0.55)   | 0.33 ( 0.21, 0.55)   | 0.34 ( 0.21, 0.54)   |
| $\rho$     | 0.31 (-0.40, 0.82)   | 0.23 (-0.49, 0.82)   | 0.24 (-0.50, 0.80)   |
| $\beta^A$  |                      | -0.06 (-0.14, 0.02)  | -0.06 (-0.14, 0.02)  |
| $\beta^W$  |                      |                      | 0.00 (-0.02, 0.01)   |

## Deviance information criterion (DIC) statistics for methods applied to artificial dataset

Table B5: DIC statistics, by likelihood, for the contrast- and arm-based models applied to the artificial dataset, 1220 IPD data points and 24 AD data points.

| Model      | Likelihood | $\bar{D}$ | pD    | DIC     |
|------------|------------|-----------|-------|---------|
| CBunadjEx2 | bernoulli  | 1652.26   | 0.65  | 1652.91 |
| CBadjEx2   | bernoulli  | 1653.93   | 2.29  | 1656.22 |
| CBadjEbEx2 | bernoulli  | 1652.35   | 1.08  | 1653.43 |
| ABunadj2   | bernoulli  | 1651.67   | 0.04  | 1651.70 |
| ABadj2     | bernoulli  | 1653.69   | 2.03  | 1655.72 |
| ABadjEb2   | bernoulli  | 1654.79   | 3.50  | 1658.29 |
| CBunadjEx2 | binomial   | 27.53     | 18.07 | 45.60   |
| CBadjEx2   | binomial   | 25.55     | 18.11 | 43.65   |
| CBadjEbEx2 | binomial   | 25.57     | 18.16 | 43.73   |
| ABunadj2   | binomial   | 24.27     | 18.57 | 42.85   |
| ABadj2     | binomial   | 24.27     | 18.69 | 42.97   |
| ABadjEb2   | binomial   | 24.20     | 18.69 | 42.89   |



## Appendix C - Stan program code

### Contrast-based unadjusted method with exchangeable baseline response parameters (*CBunadjEx*)

```
data{
  // IPD
  int <lower=1> n_patients_ipd;
  int <lower=1> study_ipd[n_patients_ipd];
  int <lower=1> treatment_ipd[n_patients_ipd];
  int <lower=1> baseline_ipd[n_patients_ipd];
  int <lower=1> arm_ipd[n_patients_ipd];
  int <lower=0, upper=1> index_ipd[n_patients_ipd];
  int <lower=0> Y[n_patients_ipd];
  // AD
  int <lower=1> n_arms_ad;
  int <lower=1> study_ad[n_arms_ad];
  int <lower=1> treatment_ad[n_arms_ad];
  int <lower=1> baseline_ad[n_arms_ad];
  int <lower=0, upper=1> index_ad[n_arms_ad];
  int <lower=1> n[n_arms_ad];
  int <lower=0> r[n_arms_ad];
  // Prior parameters
  real <lower=0> prior_norm_sd;
  real <lower=0> prior_unif_upper;
}

transformed data{
  int <lower=2> n_treatments = max(append_array(treatment_ipd, treatment_ad));
  // IPD
  int <lower=2> n_studies_ipd = max(study_ipd);
  int <lower=2> n_arms_ipd = max(arm_ipd);
  // AD
  int <lower=2> n_studies_ad = max(study_ad);
}

parameters{
  vector[n_studies_ipd + n_studies_ad] u_phi;
  vector[n_arms_ipd + n_arms_ad] u_delta;
  vector[n_treatments - 1] d_est;
  real <lower=0> sigma;
  real m_phi;
  real <lower=0> sigma_phi;
}

transformed parameters{
  vector[n_studies_ipd + n_studies_ad] phi;
```

```

vector[n_treatments] d;
vector[n_arms_ipd + n_arms_ad] m_delta;
vector[n_arms_ipd + n_arms_ad] delta;
vector[n_patients_ipd] lin_pred_ipd;
vector[n_arms_ad] lin_pred_ad;

#####
// RANDOM BASELINE RESPONSE
#####

phi = m_phi + sigma_phi * u_phi;

#####
// BASIC PARAMETERS
#####

d[1] = 0;
for (t in 2:n_treatments) d[t] = d_est[t - 1];

#####
// NETWORK CONSISTENCY
#####

for(patient in 1:n_patients_ipd){
  m_delta[arm_ipd[patient]] = d[treatment_ipd[patient]] - d[baseline_ipd[patient]];
}

for(arm in 1:n_arms_ad){
  m_delta[n_arms_ipd + arm] = d[treatment_ad[arm]] - d[baseline_ad[arm]];
}

#####
// RANDOM TREATMENT EFFECTS
#####

for(arm in 1:n_arms_ipd){
  delta[arm] = m_delta[arm] + sigma * u_delta[arm];
}

for(arm in 1:n_arms_ad){
  delta[n_arms_ipd + arm] = m_delta[n_arms_ipd + arm] +
  sigma * u_delta[n_arms_ipd + arm];
}

#####
// LINEAR PREDICTORS
#####

for (patient in 1:n_patients_ipd){

```

```

    lin_pred_ipd[patient] = phi[study_ipd[patient]] +
      delta[arm_ipd[patient]] * index_ipd[patient];
  }

  for (arm in 1:n_arms_ad){
    lin_pred_ad[arm] = phi[n_studies_ipd + study_ad[arm]] +
      delta[n_arms_ipd + arm] * index_ad[arm];
  }
}

model{
  // Implicit logit transformation onto linear predictor scale.
  Y ~ bernoulli_logit(lin_pred_ipd);
  r ~ binomial_logit(n, lin_pred_ad);

  // Random variability for baseline response.
  u_phi ~ std_normal();

  // Random variability for relative effects.
  u_delta ~ std_normal();

  // Prior distributions
  d_est ~ normal(0, prior_norm_sd);
  sigma ~ uniform(0.0001, prior_unif_upper);
  m_phi ~ normal(0, prior_norm_sd);
  sigma_phi ~ uniform(0.0001, prior_unif_upper);
}

generated quantities{
  // Absolute treatment effects.
  vector[n_treatments] theta;

  for (t in 1:n_treatments) theta[t] = m_phi + d[t];
}

```

## Contrast-based adjusted method with exchangeable baseline response parameters (*CBadjEx*)

```
data{
  // IPD
  int <lower=1> n_patients_ipd;
  int <lower=1> study_ipd[n_patients_ipd];
  int <lower=1> treatment_ipd[n_patients_ipd];
  int <lower=1> baseline_ipd[n_patients_ipd];
  int <lower=1> arm_ipd[n_patients_ipd];
  int <lower=0, upper=1> index_ipd[n_patients_ipd];
  int <lower=0> Y[n_patients_ipd];
  // AD
  int <lower=1> n_arms_ad;
  int <lower=1> study_ad[n_arms_ad];
  int <lower=1> treatment_ad[n_arms_ad];
  int <lower=1> baseline_ad[n_arms_ad];
  int <lower=0, upper=1> index_ad[n_arms_ad];
  int <lower=1> n[n_arms_ad];
  int <lower=0> r[n_arms_ad];
  // Prior parameters
  real <lower=0> prior_norm_sd;
  real <lower=0> prior_unif_upper;
  // Covariate matrices
  int <lower=1> n_cov;
  vector[n_cov] X_ipd[n_patients_ipd];
  vector[n_cov] X_ad[n_arms_ad];
}

transformed data{
  int <lower=2> n_treatments = max(append_array(treatment_ipd, treatment_ad));
  // IPD
  int <lower=2> n_studies_ipd = max(study_ipd);
  int <lower=2> n_arms_ipd = max(arm_ipd);
  // AD
  int <lower=2> n_studies_ad = max(study_ad);
}

parameters{
  row_vector[n_cov] alpha;
  vector[n_studies_ipd + n_studies_ad] u_phi;
  vector[n_arms_ipd + n_arms_ad] u_delta;
  vector[n_treatments - 1] d_est;
  real <lower=0> sigma;
  real m_phi;
  real <lower=0> sigma_phi;
}
```

```

transformed parameters{
  vector[n_studies_ipd + n_studies_ad] phi;
  vector[n_treatments] d;
  vector[n_arms_ipd + n_arms_ad] m_delta;
  vector[n_arms_ipd + n_arms_ad] delta;
  vector[n_patients_ipd] lin_pred_ipd;
  vector[n_arms_ad] lin_pred_ad;

  #####
  // RANDOM BASELINE RESPONSE
  #####

  phi = m_phi + sigma_phi * u_phi;

  #####
  // BASIC PARAMETERS
  #####

  d[1] = 0;
  for (t in 2:n_treatments) d[t] = d_est[t - 1];

  #####
  // NETWORK CONSISTENCY
  #####

  for(patient in 1:n_patients_ipd){
    m_delta[arm_ipd[patient]] = d[treatment_ipd[patient]] - d[baseline_ipd[patient]];
  }

  for(arm in 1:n_arms_ad){
    m_delta[n_arms_ipd + arm] = d[treatment_ad[arm]] - d[baseline_ad[arm]];
  }

  #####
  // RANDOM TREATMENT EFFECTS
  #####

  for(arm in 1:n_arms_ipd){
    delta[arm] = m_delta[arm] + sigma * u_delta[arm];
  }

  for(arm in 1:n_arms_ad){
    delta[n_arms_ipd + arm] = m_delta[n_arms_ipd + arm] +
      sigma * u_delta[n_arms_ipd + arm];
  }

  #####
  // LINEAR PREDICTORS

```

```

#####

for (patient in 1:n_patients_ipd){
  lin_pred_ipd[patient] = phi[study_ipd[patient]] +
    alpha * X_ipd[patient] +
    delta[arm_ipd[patient]] * index_ipd[patient];
}

for (arm in 1:n_arms_ad){
  lin_pred_ad[arm] = phi[n_studies_ipd + study_ad[arm]] +
    alpha * X_ad[arm] +
    delta[n_arms_ipd + arm] * index_ad[arm];
}
}

model{
  // Implicit logit transformation onto linear predictor scale.
  Y ~ bernoulli_logit(lin_pred_ipd);
  r ~ binomial_logit(n, lin_pred_ad);

  // Random variability for baseline response.
  u_phi ~ std_normal();

  // Random variability for relative effects.
  u_delta ~ std_normal();

  // Prior distributions
  d_est ~ normal(0, prior_norm_sd);
  sigma ~ uniform(0.0001, prior_unif_upper);
  m_phi ~ normal(0, prior_norm_sd);
  sigma_phi ~ uniform(0.0001, prior_unif_upper);
  alpha ~ normal(0, prior_norm_sd);
}

generated quantities{
  // Absolute treatment effects.
  vector[n_treatments] theta;

  for (t in 1:n_treatments) theta[t] = m_phi + d[t];
}

```

## Contrast-based adjusted ecological bias method with exchangeable baseline response parameters (*CBadjEbEx*)

```

data{
  // IPD
  int <lower=1> n_patients_ipd;
  int <lower=1> study_ipd[n_patients_ipd];
  int <lower=1> treatment_ipd[n_patients_ipd];
  int <lower=1> baseline_ipd[n_patients_ipd];
  int <lower=1> arm_ipd[n_patients_ipd];
  int <lower=0, upper=1> index_ipd[n_patients_ipd];
  int <lower=0> Y[n_patients_ipd];
  // AD
  int <lower=1> n_arms_ad;
  int <lower=1> study_ad[n_arms_ad];
  int <lower=1> treatment_ad[n_arms_ad];
  int <lower=1> baseline_ad[n_arms_ad];
  int <lower=0, upper=1> index_ad[n_arms_ad];
  int <lower=1> n[n_arms_ad];
  int <lower=0> r[n_arms_ad];
  // Prior parameters
  real <lower=0> prior_norm_sd;
  real <lower=0> prior_unif_upper;
  // Covariate matrices
  int <lower=1> n_cov;
  vector[n_cov] X_ipd[n_patients_ipd];
  vector[n_cov] X_ad[n_arms_ad];
  vector[n_cov] Xbar_ipd[n_patients_ipd];
}

transformed data{
  int <lower=2> n_treatments = max(append_array(treatment_ipd, treatment_ad));
  // IPD
  int <lower=2> n_studies_ipd = max(study_ipd);
  int <lower=2> n_arms_ipd = max(arm_ipd);
  // AD
  int <lower=2> n_studies_ad = max(study_ad);
}

parameters{
  vector[n_studies_ipd + n_studies_ad] u_phi;
  vector[n_arms_ipd + n_arms_ad] u_delta;
  vector[n_treatments - 1] d_est;
  real <lower=0> sigma;
  real m_phi;
  real <lower=0> sigma_phi;
  row_vector[n_cov] alpha_w;
  row_vector[n_cov] alpha_a;
}

```

```
}
```

```
transformed parameters{  
  vector[n_studies_ipd + n_studies_ad] phi;  
  vector[n_treatments] d;  
  vector[n_arms_ipd + n_arms_ad] m_delta;  
  vector[n_arms_ipd + n_arms_ad] delta;  
  vector[n_patients_ipd] lin_pred_ipd;  
  vector[n_arms_ad] lin_pred_ad;  
  
  #####  
  // RANDOM BASELINE RESPONSE  
  #####  
  
  phi = m_phi + sigma_phi * u_phi;  
  
  #####  
  // BASIC PARAMETERS  
  #####  
  
  d[1] = 0;  
  for (t in 2:n_treatments) d[t] = d_est[t - 1];  
  
  #####  
  // NETWORK CONSISTENCY  
  #####  
  
  for(patient in 1:n_patients_ipd){  
    m_delta[arm_ipd[patient]] = d[treatment_ipd[patient]] - d[baseline_ipd[patient]];  
  }  
  
  for(arm in 1:n_arms_ad){  
    m_delta[n_arms_ipd + arm] = d[treatment_ad[arm]] - d[baseline_ad[arm]];  
  }  
  
  #####  
  // RANDOM TREATMENT EFFECTS  
  #####  
  
  for(arm in 1:n_arms_ipd){  
    delta[arm] = m_delta[arm] + sigma * u_delta[arm];  
  }  
  
  for(arm in 1:n_arms_ad){  
    delta[n_arms_ipd + arm] = m_delta[n_arms_ipd + arm] +  
      sigma * u_delta[n_arms_ipd + arm];  
  }  
}
```



```

#####
// LINEAR PREDICTORS
#####

for (patient in 1:n_patients_ipd){
  lin_pred_ipd[patient] = phi[study_ipd[patient]] +
    alpha_a * Xbar_ipd[patient] +
    alpha_w * (X_ipd[patient] - Xbar_ipd[patient]) +
    delta[arm_ipd[patient]] * index_ipd[patient];
}

for (arm in 1:n_arms_ad){
  lin_pred_ad[arm] = phi[n_studies_ipd + study_ad[arm]] +
    alpha_a * X_ad[arm] +
    delta[n_arms_ipd + arm] * index_ad[arm];
}
}

model{
  // Implicit logit transformation onto linear predictor scale.
  Y ~ bernoulli_logit(lin_pred_ipd);
  r ~ binomial_logit(n, lin_pred_ad);

  // Random variability for baseline response.
  u_phi ~ std_normal();

  // Random variability for relative effects.
  u_delta ~ std_normal();

  // Prior distributions
  d_est ~ normal(0, prior_norm_sd);
  sigma ~ uniform(0.0001, prior_unif_upper);
  m_phi ~ normal(0, prior_norm_sd);
  sigma_phi ~ uniform(0.0001, prior_unif_upper);
  alpha_a ~ normal(0, prior_norm_sd);
  alpha_w ~ normal(0, prior_norm_sd);
}

generated quantities{
  // Absolute treatment effects.
  vector[n_treatments] theta;

  for (t in 1:n_treatments) theta[t] = m_phi + d[t];
}

```

## Arm-based unadjusted method *ABunadj*

```
data{
  // IPD
  int <lower=1> n_patients_ipd;
  int <lower=1> study_ipd[n_patients_ipd];
  int <lower=1> treatment_ipd[n_patients_ipd];
  int <lower=1> baseline_ipd[n_patients_ipd];
  int <lower=1> arm_ipd[n_patients_ipd];
  int <lower=0, upper=1> index_ipd[n_patients_ipd];
  int <lower=0> Y[n_patients_ipd];
  // AD
  int <lower=1> n_arms_ad;
  int <lower=1> study_ad[n_arms_ad];
  int <lower=1> treatment_ad[n_arms_ad];
  int <lower=1> baseline_ad[n_arms_ad];
  int <lower=0, upper=1> index_ad[n_arms_ad];
  int <lower=1> n[n_arms_ad];
  int <lower=0> r[n_arms_ad];
  // Prior parameters
  real <lower=0> prior_norm_sd;
  real <lower=0> prior_unif_upper;
  //
  int <lower=2> n_studies_ipd;
  int nu_indices_ipd[n_studies_ipd, 2];
}

transformed data{
  int <lower=2> n_treatments = max(append_array(treatment_ipd, treatment_ad));
  int <lower=2> n_arms_ipd = max(arm_ipd);
  int <lower=2> n_studies_ad = max(study_ad);
}

parameters{
  vector[n_arms_ipd + n_arms_ad] u_nu;
  vector[n_treatments] theta;
  real <lower=0> tau;
  real <lower=-1, upper=1> rho;
}

transformed parameters{
  matrix[2, 2] L;
  vector[n_arms_ipd + n_arms_ad] nu;
  vector[n_patients_ipd] lin_pred_ipd;
  vector[n_arms_ad] lin_pred_ad;

  #####
}
```

```

// CHOLESKY DECOMPOSITION
#####

L[1, 1] = 1;    L[1, 2] = 0;
L[2, 1] = rho;  L[2, 2] = sqrt(1 - rho ^ 2);

#####
// RANDOM TREATMENT EFFECTS
#####

for(stud in 1:n_studies_ipd){
  int s = nu_indices_ipd[stud, 1];
  int t = nu_indices_ipd[stud, 2];
  if (s == t) { // single-arm trials
    nu[s] = tau * u_nu[s];
  } else { // randomised trials
    nu[s:t] = tau * L * u_nu[s:t];
  }
}

for(stud in 1:n_studies_ad){
  int s = n_arms_ipd + (2 * stud - 1);
  nu[s:s + 1] = tau * L * u_nu[s:s + 1];
}

#####
// LINEAR PREDICTORS
#####

for (patient in 1:n_patients_ipd){
  lin_pred_ipd[patient] = theta[treatment_ipd[patient]] + nu[arm_ipd[patient]];
}

for (arm in 1:n_arms_ad){
  lin_pred_ad[arm] = theta[treatment_ad[arm]] + nu[n_arms_ipd + arm];
}
}

model{
  // Implicit logit transformation onto linear predictor scale.
  Y ~ bernoulli_logit(lin_pred_ipd);
  r ~ binomial_logit(n, lin_pred_ad);

  // Random variability for random effects.
  u_nu ~ std_normal();

  // Prior distributions
  theta ~ normal(0, prior_norm_sd);
  tau ~ uniform(0.0001, prior_unif_upper);
}

```

```
rho ~ uniform(-0.999, 0.999);
}

generated quantities{
  // Basic parameters for relative treatment effects.
  vector[n_treatments - 1] d_est;

  for (t in 2:n_treatments) d_est[t - 1] = theta[t] - theta[1];
}
```

## Arm-based adjusted method *ABadj*

```
data{
  // IPD
  int <lower=1> n_patients_ipd;
  int <lower=1> study_ipd[n_patients_ipd];
  int <lower=1> treatment_ipd[n_patients_ipd];
  int <lower=1> baseline_ipd[n_patients_ipd];
  int <lower=1> arm_ipd[n_patients_ipd];
  int <lower=0, upper=1> index_ipd[n_patients_ipd];
  int <lower=0> Y[n_patients_ipd];
  // AD
  int <lower=1> n_arms_ad;
  int <lower=1> study_ad[n_arms_ad];
  int <lower=1> treatment_ad[n_arms_ad];
  int <lower=1> baseline_ad[n_arms_ad];
  int <lower=0, upper=1> index_ad[n_arms_ad];
  int <lower=1> n[n_arms_ad];
  int <lower=0> r[n_arms_ad];
  // Prior parameters
  real <lower=0> prior_norm_sd;
  real <lower=0> prior_unif_upper;
  //
  int <lower=2> n_studies_ipd;
  int nu_indices_ipd[n_studies_ipd, 2];
  // Covariate matrices
  int <lower=1> n_cov;
  vector[n_cov] X_ipd[n_patients_ipd];
  vector[n_cov] X_ad[n_arms_ad];
}

transformed data{
  int <lower=2> n_treatments = max(append_array(treatment_ipd, treatment_ad));
  int <lower=2> n_arms_ipd = max(arm_ipd);
  int <lower=2> n_studies_ad = max(study_ad);
}

parameters{
  row_vector[n_cov] beta;
  vector[n_arms_ipd + n_arms_ad] u_nu;
  vector[n_treatments] theta;
  real <lower=0> tau;
  real <lower=-1, upper=1> rho;
}

transformed parameters{
  matrix[2, 2] L;
```

```

vector[n_arms_ipd + n_arms_ad] nu;
vector[n_patients_ipd] lin_pred_ipd;
vector[n_arms_ad] lin_pred_ad;

#####
// CHOLESKY DECOMPOSITION
#####

L[1, 1] = 1;    L[1, 2] = 0;
L[2, 1] = rho; L[2, 2] = sqrt(1 - rho ^ 2);

#####
// RANDOM TREATMENT EFFECTS
#####

for(stud in 1:n_studies_ipd){
  int s = nu_indices_ipd[stud, 1];
  int t = nu_indices_ipd[stud, 2];
  if (s == t) { // single-arm trials
    nu[s] = tau * u_nu[s];
  } else { // randomised trials
    nu[s:t] = tau * L * u_nu[s:t];
  }
}

for(stud in 1:n_studies_ad){
  int s = n_arms_ipd + (2 * stud - 1);
  nu[s:s + 1] = tau * L * u_nu[s:s + 1];
}

#####
// LINEAR PREDICTORS
#####

for (patient in 1:n_patients_ipd){
  lin_pred_ipd[patient] = theta[treatment_ipd[patient]] +
    nu[arm_ipd[patient]] +
    beta * X_ipd[patient];
}

for (arm in 1:n_arms_ad){
  lin_pred_ad[arm] = theta[treatment_ad[arm]] +
    nu[n_arms_ipd + arm] +
    beta * X_ad[arm];
}
}

model{
  // Implicit logit transformation onto linear predictor scale.

```

```

Y ~ bernoulli_logit(lin_pred_ipd);
r ~ binomial_logit(n, lin_pred_ad);

// Random variability for random effects.
u_nu ~ std_normal();

// Prior distributions
theta ~ normal(0, prior_norm_sd);
tau ~ uniform(0.0001, prior_unif_upper);
rho ~ uniform(-0.999, 0.999);
beta ~ normal(0, prior_norm_sd);
}

generated quantities{
  // Basic parameters for relative treatment effects.
  vector[n_treatments - 1] d_est;

  for (t in 2:n_treatments) d_est[t - 1] = theta[t] - theta[1];
}

```

## Arm-based adjusted ecological bias method *ABadjEb*

```
data{
  // IPD
  int <lower=1> n_patients_ipd;
  int <lower=1> study_ipd[n_patients_ipd];
  int <lower=1> treatment_ipd[n_patients_ipd];
  int <lower=1> baseline_ipd[n_patients_ipd];
  int <lower=1> arm_ipd[n_patients_ipd];
  int <lower=0, upper=1> index_ipd[n_patients_ipd];
  int <lower=0> Y[n_patients_ipd];
  // AD
  int <lower=1> n_arms_ad;
  int <lower=1> study_ad[n_arms_ad];
  int <lower=1> treatment_ad[n_arms_ad];
  int <lower=1> baseline_ad[n_arms_ad];
  int <lower=0, upper=1> index_ad[n_arms_ad];
  int <lower=1> n[n_arms_ad];
  int <lower=0> r[n_arms_ad];
  // Prior parameters
  real <lower=0> prior_norm_sd;
  real <lower=0> prior_unif_upper;
  //
  int <lower=2> n_studies_ipd;
  int nu_indices_ipd[n_studies_ipd, 2];
  // Covariate matrices
  int <lower=1> n_cov;
  vector[n_cov] X_ipd[n_patients_ipd];
  vector[n_cov] X_ad[n_arms_ad];
  vector[n_cov] Xbar_ipd[n_patients_ipd];
}

transformed data{
  int <lower=2> n_treatments = max(append_array(treatment_ipd, treatment_ad));
  int <lower=2> n_arms_ipd = max(arm_ipd);
  int <lower=2> n_studies_ad = max(study_ad);
}

parameters{
  vector[n_arms_ipd + n_arms_ad] u_nu;
  vector[n_treatments] theta;
  real <lower=0> tau;
  real <lower=-1, upper=1> rho;
  row_vector[n_cov] beta_a;
  row_vector[n_cov] beta_w;
}
```



```

transformed parameters{
  matrix[2, 2] L;
  vector[n_arms_ipd + n_arms_ad] nu;
  vector[n_patients_ipd] lin_pred_ipd;
  vector[n_arms_ad] lin_pred_ad;

  #####
  // CHOLESKY DECOMPOSITION
  #####

  L[1, 1] = 1;    L[1, 2] = 0;
  L[2, 1] = rho; L[2, 2] = sqrt(1 - rho ^ 2);

  #####
  // RANDOM TREATMENT EFFECTS
  #####

  for(stud in 1:n_studies_ipd){
    int s = nu_indices_ipd[stud, 1];
    int t = nu_indices_ipd[stud, 2];
    if (s == t) { // single-arm trials
      nu[s] = tau * u_nu[s];
    } else { // randomised trials
      nu[s:t] = tau * L * u_nu[s:t];
    }
  }

  for(stud in 1:n_studies_ad){
    int s = n_arms_ipd + (2 * stud - 1);
    nu[s:s + 1] = tau * L * u_nu[s:s + 1];
  }

  #####
  // LINEAR PREDICTORS
  #####

  for (patient in 1:n_patients_ipd){
    lin_pred_ipd[patient] = theta[treatment_ipd[patient]] +
      nu[arm_ipd[patient]] +
      beta_a * Xbar_ipd[patient] +
      beta_w * (X_ipd[patient] - Xbar_ipd[patient]);
  }

  for (arm in 1:n_arms_ad){
    lin_pred_ad[arm] = theta[treatment_ad[arm]] +
      nu[n_arms_ipd + arm] +
      beta_a * X_ad[arm];
  }
}

```

```

model{
  // Implicit logit transformation onto linear predictor scale.
  Y ~ bernoulli_logit(lin_pred_ipd);
  r ~ binomial_logit(n, lin_pred_ad);

  // Random variability for random effects.
  u_nu ~ std_normal();

  // Prior distributions
  theta ~ normal(0, prior_norm_sd);
  tau ~ uniform(0.0001, prior_unif_upper);
  rho ~ uniform(-0.999, 0.999);
  beta_a ~ normal(0, prior_norm_sd);
  beta_w ~ normal(0, prior_norm_sd);
}

generated quantities{
  // Basic parameters for relative treatment effects.
  vector[n_treatments - 1] d_est;

  for (t in 2:n_treatments) d_est[t - 1] = theta[t] - theta[1];
}

```

## Appendix D - MCMC diagnostic plots

Contrast-based unadjusted method with exchangeable baseline response  
(*CBunadjEx*)

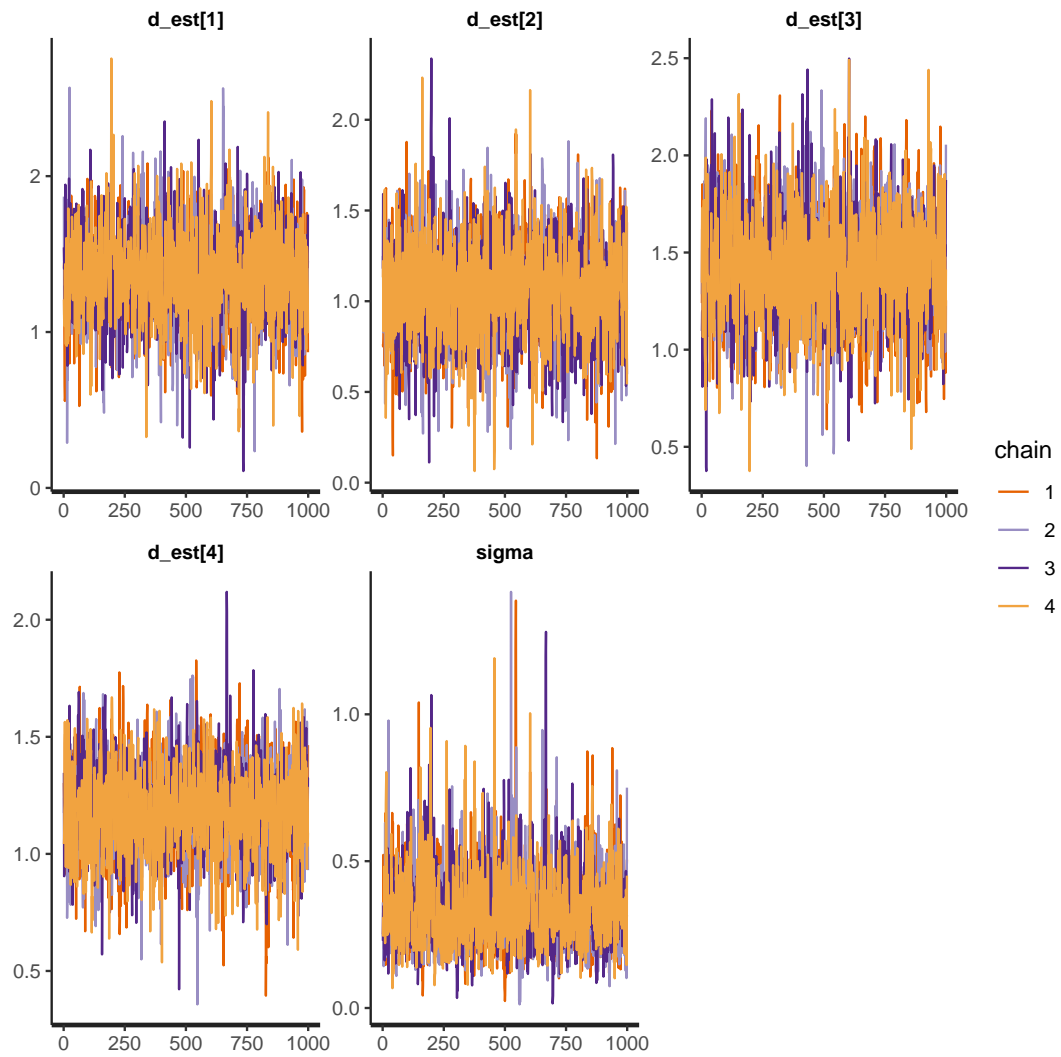

Figure D1: Trace plot

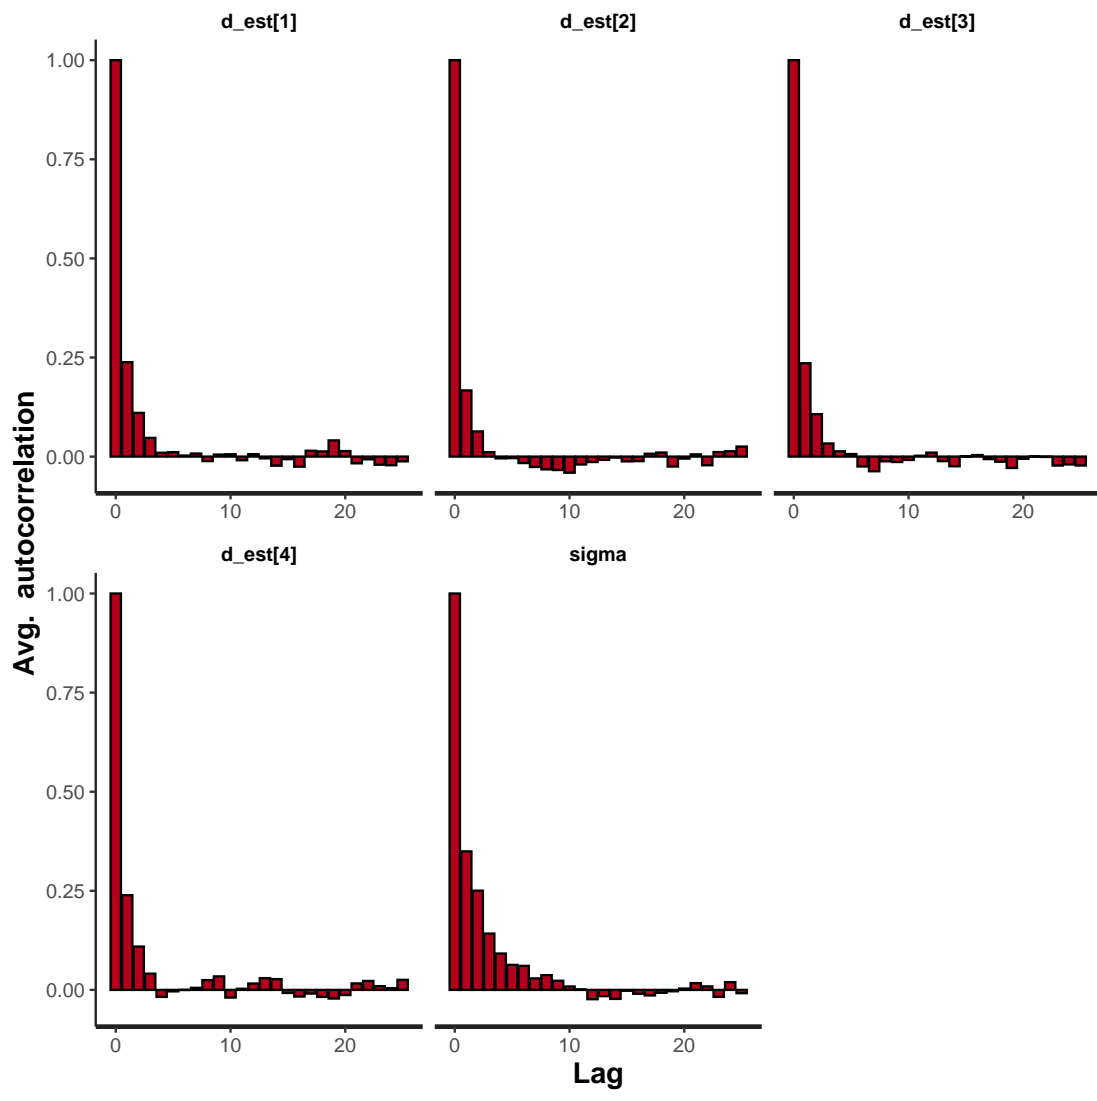

Figure D2: Autocorrelation plot

Contrast-based adjusted method with exchangeable baseline response  
(*CBadjEx*)

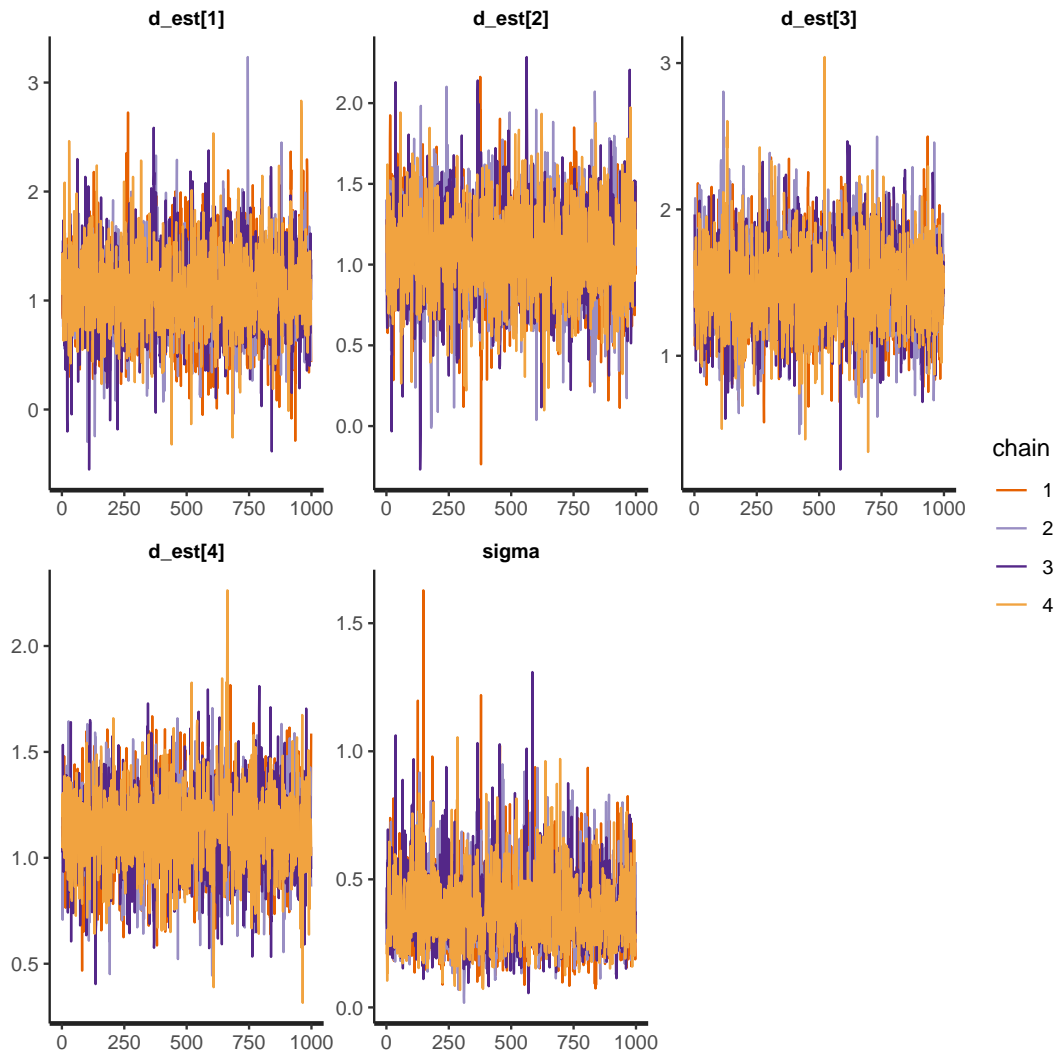

Figure D3: Trace plot

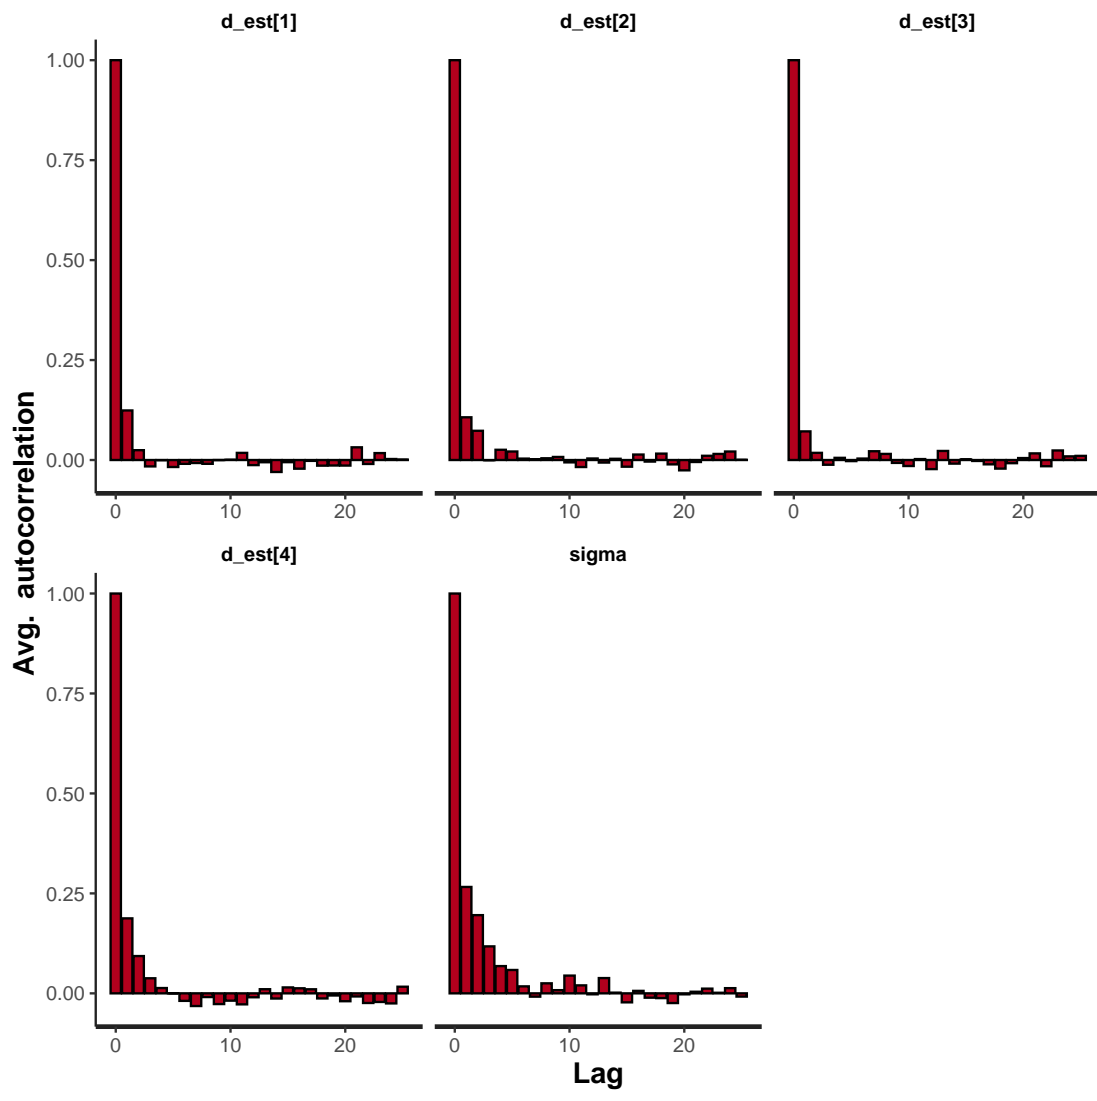

Figure D4: Autocorrelation plot

Arm-based adjusted method (*ABadj*)

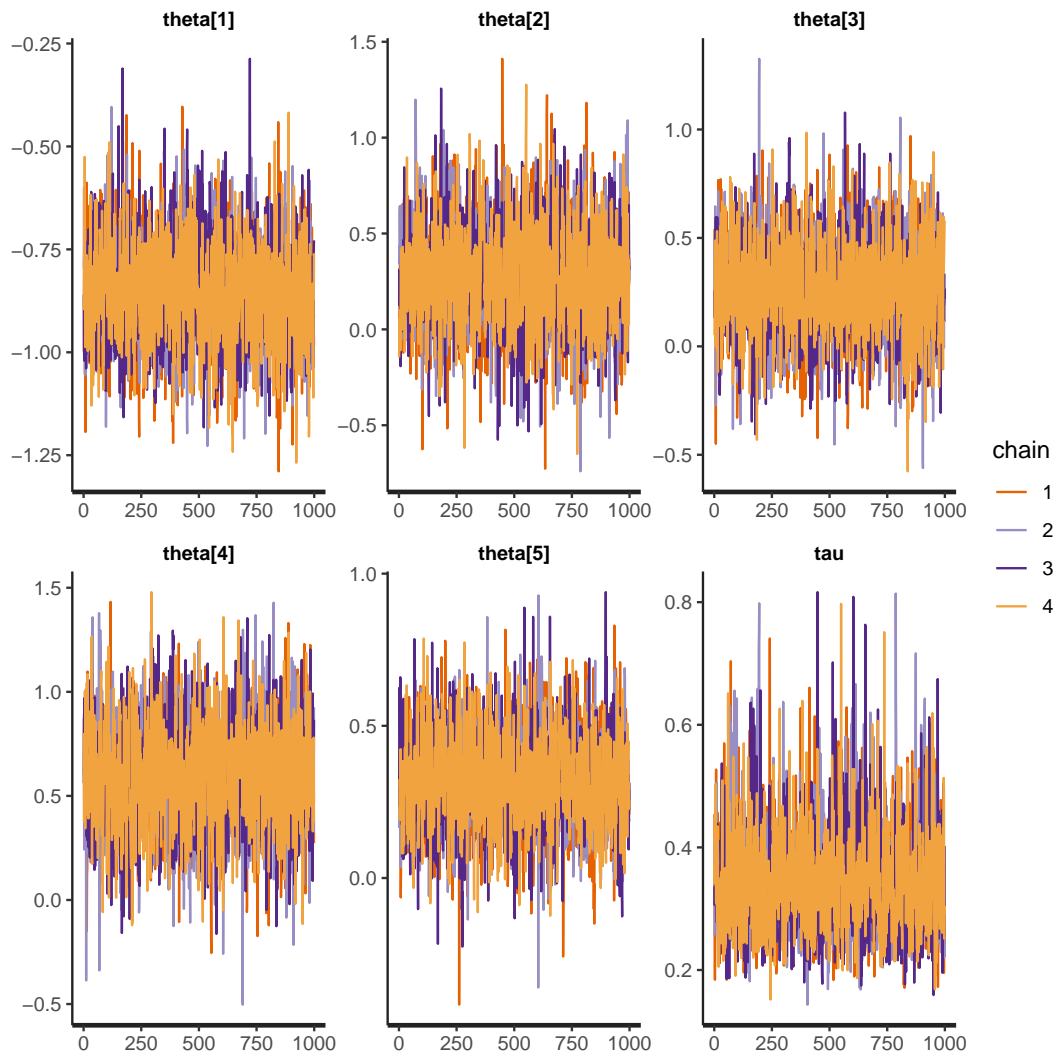

Figure D5: Trace plot

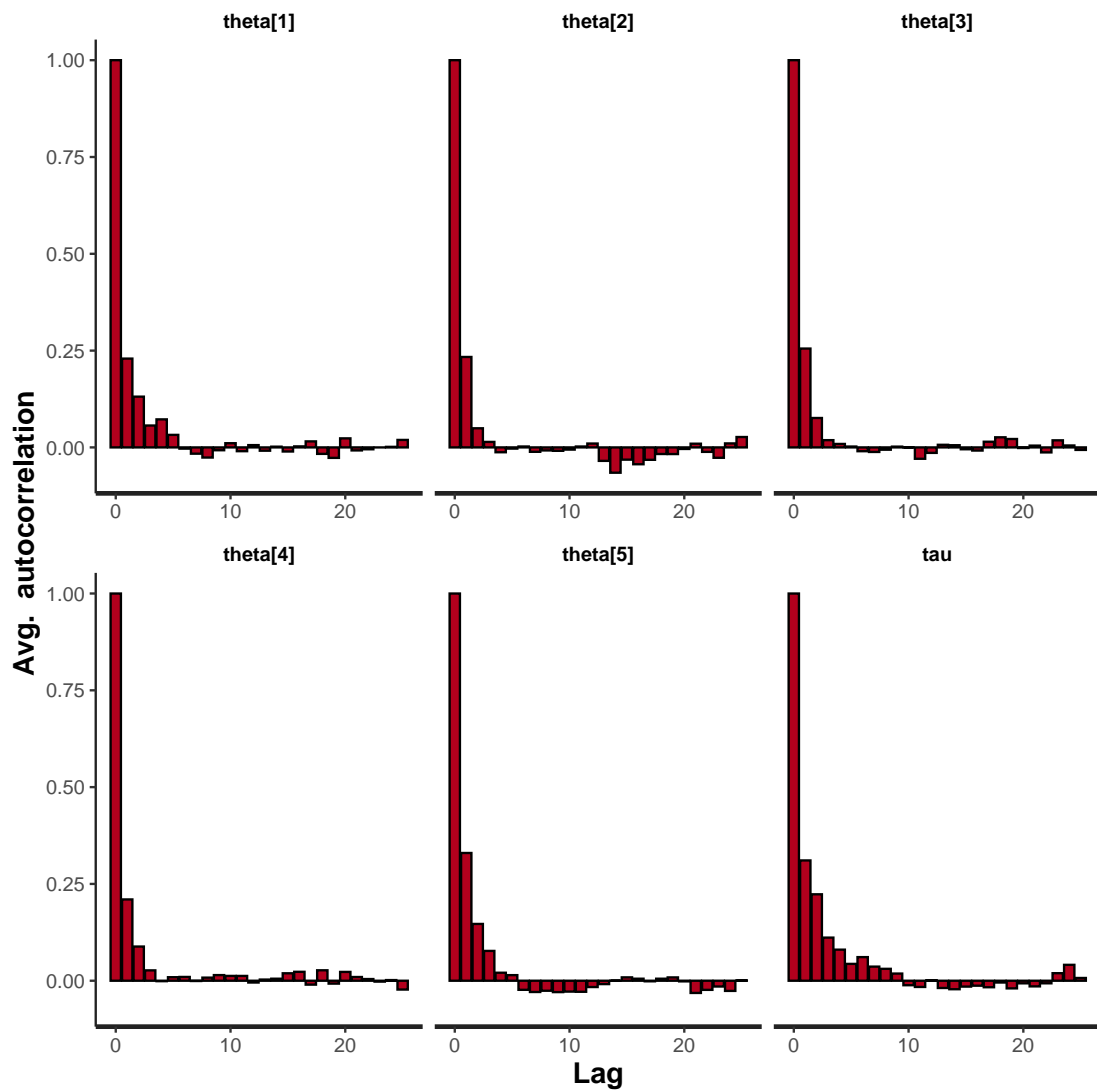

Figure D6: Autocorrelation plot



## Appendix E - Sensitivity analysis on prior distribution for between-study heterogeneity parameters

Parameter estimates presented in the following tables are the result of a sensitivity analysis concerning the non-informative Uniform prior distribution placed on between-study heterogeneity parameters. A  $U(0, 2)$  prior distribution was used in the original analysis, whilst a  $U(0, 10)$  has been used in this sensitivity analysis.

### Parameter estimates for contrast-based unadjusted methods

Table E1: Median and 95% credible interval estimates for model parameters corresponding to the contrast-based unadjusted methods.

| Parameter   | CBunadjInd1          | CBunadjEx1           | CBunadjInd2          | CBunadjEx2           |
|-------------|----------------------|----------------------|----------------------|----------------------|
| $\phi_1$    | -1.06 (-1.37, -0.77) | -1.03 (-1.32, -0.76) | -0.90 (-1.50, -0.27) | -0.91 (-1.64, -0.24) |
| $\phi_2$    | -1.11 (-1.33, -0.90) | -1.08 (-1.30, -0.87) | -0.77 (-1.39, -0.16) | -0.76 (-1.45, -0.07) |
| $\phi_3$    | -1.11 (-1.58, -0.66) | -1.00 (-1.38, -0.67) | -1.09 (-1.57, -0.67) | -0.98 (-1.40, -0.63) |
| $\phi_4$    | -1.53 (-2.17, -0.99) | -1.22 (-1.72, -0.82) | -1.53 (-2.20, -0.97) | -1.19 (-1.71, -0.79) |
| $\phi_5$    | -0.90 (-1.21, -0.61) | -0.88 (-1.15, -0.62) | -0.91 (-1.21, -0.62) | -0.87 (-1.14, -0.60) |
| $\phi_6$    | -1.11 (-2.08, -0.18) | -0.96 (-1.52, -0.44) | -1.11 (-2.07, -0.19) | -0.92 (-1.55, -0.37) |
| $\phi_7$    | -0.59 (-1.18, -0.01) | -0.72 (-1.13, -0.28) | -0.60 (-1.17, -0.04) | -0.69 (-1.12, -0.25) |
| $\phi_8$    | -0.92 (-1.28, -0.58) | -0.91 (-1.22, -0.60) | -0.92 (-1.28, -0.58) | -0.88 (-1.21, -0.60) |
| $\phi_9$    | -1.18 (-1.55, -0.80) | -1.12 (-1.46, -0.81) | -1.18 (-1.55, -0.78) | -1.12 (-1.45, -0.80) |
| $\phi_{10}$ | -0.39 (-0.76, -0.03) | -0.52 (-0.85, -0.18) | -0.39 (-0.75, -0.02) | -0.51 (-0.82, -0.16) |
| $\phi_{11}$ | -0.11 (-0.43, 0.20)  | -0.28 (-0.58, 0.03)  | -0.11 (-0.42, 0.21)  | -0.27 (-0.58, 0.05)  |
| $\phi_{12}$ | -0.87 (-1.36, -0.41) | -0.89 (-1.24, -0.52) | -0.88 (-1.35, -0.42) | -0.87 (-1.24, -0.51) |
| $\phi_{13}$ | -0.59 (-1.03, -0.20) | -0.64 (-1.00, -0.29) | -0.59 (-1.01, -0.19) | -0.62 (-0.99, -0.27) |
| $\phi_{14}$ | -1.06 (-1.39, -0.76) | -1.01 (-1.31, -0.76) | -1.06 (-1.38, -0.76) | -1.01 (-1.29, -0.73) |
| $d_1$       | 0.00 ( 0.00, 0.00)   | 0.00 ( 0.00, 0.00)   | 0.00 ( 0.00, 0.00)   | 0.00 ( 0.00, 0.00)   |
| $d_2$       | 1.37 ( 0.65, 2.10)   | 1.35 ( 0.76, 1.92)   | 1.12 ( 0.29, 1.94)   | 1.11 ( 0.32, 1.94)   |
| $d_3$       | 1.05 ( 0.37, 1.69)   | 1.06 ( 0.56, 1.57)   | 1.04 ( 0.41, 1.70)   | 1.05 ( 0.54, 1.54)   |
| $d_4$       | 1.59 ( 0.91, 2.28)   | 1.43 ( 0.88, 1.99)   | 1.57 ( 0.92, 2.26)   | 1.40 ( 0.85, 1.98)   |
| $d_5$       | 1.14 ( 0.69, 1.57)   | 1.17 ( 0.82, 1.52)   | 1.13 ( 0.70, 1.58)   | 1.16 ( 0.82, 1.52)   |
| $\sigma$    | 0.41 ( 0.19, 0.87)   | 0.32 ( 0.13, 0.68)   | 0.41 ( 0.18, 0.86)   | 0.32 ( 0.10, 0.67)   |

## Parameter estimates for arm-based unadjusted methods

Table E2: Median and 95% credible interval estimates for model parameters corresponding to the contrast-based unadjusted and adjusted methods.

| Parameter     | CBunadjEx2           | CBadjEx2             | CBadjEbEx2           |
|---------------|----------------------|----------------------|----------------------|
| $m_\phi$      | -0.83 (-1.10, -0.57) | -0.84 (-1.07, -0.61) | -0.84 (-1.07, -0.62) |
| $\sigma_\phi$ | 0.34 ( 0.18, 0.62)   | 0.27 ( 0.12, 0.55)   | 0.27 ( 0.13, 0.55)   |
| $\phi_1$      | -0.91 (-1.64, -0.24) | -0.93 (-1.56, -0.38) | -0.93 (-1.57, -0.36) |
| $\phi_2$      | -0.76 (-1.45, -0.07) | -0.74 (-1.33, -0.14) | -0.74 (-1.34, -0.11) |
| $\phi_3$      | -0.98 (-1.40, -0.63) | -0.94 (-1.31, -0.60) | -0.94 (-1.32, -0.61) |
| $\phi_4$      | -1.19 (-1.71, -0.79) | -0.95 (-1.43, -0.54) | -0.95 (-1.48, -0.54) |
| $\phi_5$      | -0.87 (-1.14, -0.60) | -0.66 (-0.99, -0.28) | -0.66 (-0.98, -0.26) |
| $\phi_6$      | -0.92 (-1.55, -0.37) | -0.93 (-1.49, -0.43) | -0.93 (-1.48, -0.47) |
| $\phi_7$      | -0.69 (-1.12, -0.25) | -0.77 (-1.17, -0.36) | -0.77 (-1.18, -0.34) |
| $\phi_8$      | -0.88 (-1.21, -0.60) | -1.01 (-1.38, -0.69) | -1.01 (-1.39, -0.70) |
| $\phi_9$      | -1.12 (-1.45, -0.80) | -1.06 (-1.39, -0.76) | -1.05 (-1.39, -0.75) |
| $\phi_{10}$   | -0.51 (-0.82, -0.16) | -0.55 (-0.86, -0.22) | -0.55 (-0.86, -0.20) |
| $\phi_{11}$   | -0.27 (-0.58, 0.05)  | -0.66 (-1.09, -0.18) | -0.66 (-1.10, -0.20) |
| $\phi_{12}$   | -0.87 (-1.24, -0.51) | -0.83 (-1.19, -0.46) | -0.82 (-1.19, -0.46) |
| $\phi_{13}$   | -0.62 (-0.99, -0.27) | -0.63 (-0.97, -0.26) | -0.63 (-0.97, -0.27) |
| $\phi_{14}$   | -1.01 (-1.29, -0.73) | -1.06 (-1.36, -0.78) | -1.07 (-1.38, -0.79) |
| $d_1$         | 0.00 ( 0.00, 0.00)   | 0.00 ( 0.00, 0.00)   | 0.00 ( 0.00, 0.00)   |
| $d_2$         | 1.11 ( 0.32, 1.94)   | 1.09 ( 0.36, 1.81)   | 1.10 ( 0.34, 1.85)   |
| $d_3$         | 1.05 ( 0.54, 1.54)   | 1.07 ( 0.51, 1.58)   | 1.07 ( 0.51, 1.61)   |
| $d_4$         | 1.40 ( 0.85, 1.98)   | 1.49 ( 0.92, 2.08)   | 1.48 ( 0.89, 2.05)   |
| $d_5$         | 1.16 ( 0.82, 1.52)   | 1.13 ( 0.76, 1.51)   | 1.13 ( 0.75, 1.54)   |
| $\sigma$      | 0.32 ( 0.10, 0.67)   | 0.36 ( 0.16, 0.71)   | 0.36 ( 0.17, 0.75)   |
| $\alpha^a$    |                      | -0.10 (-0.20, 0.00)  | -0.10 (-0.20, 0.00)  |
| $\alpha^w$    |                      |                      | 0.00 (-0.02, 0.01)   |

## Parameter estimates for contrast-based methods applied to the artificial dataset

Table E3: Median and 95% credible interval estimates for model parameters corresponding to the arm-based unadjusted models.

| Parameter  | ABunadj1             | ABunadj2             |
|------------|----------------------|----------------------|
| $\theta_1$ | -0.88 (-1.10, -0.67) | -0.83 (-1.09, -0.58) |
| $\theta_2$ | 0.33 (-0.17, 0.80)   | 0.29 (-0.25, 0.82)   |
| $\theta_3$ | 0.24 (-0.22, 0.66)   | 0.24 (-0.20, 0.67)   |
| $\theta_4$ | 0.44 ( 0.00, 0.90)   | 0.45 (-0.02, 0.91)   |
| $\theta_5$ | 0.36 ( 0.06, 0.66)   | 0.38 ( 0.06, 0.71)   |
| $\nu_1$    | -0.12 (-0.48, 0.21)  | -0.16 (-0.68, 0.38)  |
| $\nu_2$    | -0.19 (-0.66, 0.30)  | 0.14 (-0.38, 0.68)   |
| $\nu_3$    | 0.10 (-0.38, 0.60)   | 0.04 (-0.40, 0.50)   |
| $\nu_4$    | -0.21 (-0.50, 0.08)  | -0.22 (-0.68, 0.16)  |
| $\nu_5$    | 0.04 (-0.39, 0.50)   | -0.05 (-0.53, 0.45)  |
| $\nu_6$    | -0.20 (-0.62, 0.21)  | -0.46 (-1.00, 0.01)  |
| $\nu_7$    | -0.04 (-0.52, 0.41)  | 0.04 (-0.42, 0.54)   |
| $\nu_8$    | -0.41 (-0.96, 0.02)  | -0.04 (-0.38, 0.31)  |
| $\nu_9$    | 0.05 (-0.43, 0.50)   | -0.13 (-0.68, 0.40)  |
| $\nu_{10}$ | 0.01 (-0.33, 0.34)   | -0.02 (-0.61, 0.65)  |
| $\nu_{11}$ | -0.12 (-0.65, 0.40)  | 0.07 (-0.32, 0.47)   |
| $\nu_{12}$ | 0.00 (-0.61, 0.58)   | 0.14 (-0.34, 0.68)   |
| $\nu_{13}$ | 0.08 (-0.31, 0.47)   | 0.00 (-0.37, 0.37)   |
| $\nu_{14}$ | 0.17 (-0.31, 0.68)   | -0.09 (-0.48, 0.30)  |
| $\nu_{15}$ | 0.01 (-0.36, 0.39)   | -0.55 (-0.94, -0.20) |
| $\nu_{16}$ | -0.05 (-0.41, 0.30)  | -0.24 (-0.65, 0.16)  |
| $\nu_{17}$ | -0.54 (-0.92, -0.18) | 0.14 (-0.33, 0.60)   |
| $\nu_{18}$ | -0.20 (-0.59, 0.18)  | 0.37 ( 0.00, 0.77)   |
| $\nu_{19}$ | 0.14 (-0.33, 0.63)   | 0.12 (-0.26, 0.47)   |
| $\nu_{20}$ | 0.40 ( 0.04, 0.78)   | 0.64 ( 0.28, 1.02)   |
| $\nu_{21}$ | 0.12 (-0.23, 0.49)   | -0.14 (-0.65, 0.33)  |
| $\nu_{22}$ | 0.67 ( 0.34, 1.05)   | -0.02 (-0.46, 0.42)  |
| $\nu_{23}$ | -0.13 (-0.63, 0.36)  | 0.47 ( 0.10, 0.89)   |
| $\nu_{24}$ | 0.02 (-0.39, 0.45)   | 0.13 (-0.29, 0.56)   |
| $\nu_{25}$ | 0.48 ( 0.12, 0.88)   | -0.04 (-0.38, 0.30)  |
| $\nu_{26}$ | 0.17 (-0.25, 0.58)   | -0.21 (-0.57, 0.14)  |
| $\nu_{27}$ | -0.02 (-0.36, 0.31)  |                      |
| $\nu_{28}$ | -0.17 (-0.51, 0.16)  |                      |
| $\tau$     | 0.33 ( 0.22, 0.52)   | 0.35 ( 0.23, 0.55)   |
| $\rho$     | 0.28 (-0.40, 0.81)   | 0.31 (-0.41, 0.82)   |

## Parameter estimates for arm-based methods applied to the artificial dataset

Table E4: Median and 95% credible interval estimates for model parameters corresponding to the arm-based unadjusted and adjusted models.

| Parameter  | ABunadj2             | ABadj2               | ABadjEb2             |
|------------|----------------------|----------------------|----------------------|
| $\theta_1$ | -0.83 (-1.09, -0.58) | -0.85 (-1.09, -0.60) | -0.85 (-1.11, -0.61) |
| $\theta_2$ | 0.29 (-0.25, 0.82)   | 0.26 (-0.26, 0.77)   | 0.27 (-0.27, 0.77)   |
| $\theta_3$ | 0.24 (-0.20, 0.67)   | 0.28 (-0.13, 0.68)   | 0.27 (-0.18, 0.71)   |
| $\theta_4$ | 0.45 (-0.02, 0.91)   | 0.60 ( 0.11, 1.07)   | 0.60 ( 0.10, 1.07)   |
| $\theta_5$ | 0.38 ( 0.06, 0.71)   | 0.32 ( 0.02, 0.62)   | 0.32 ( 0.00, 0.63)   |
| $\nu_1$    | -0.16 (-0.68, 0.38)  | -0.21 (-0.74, 0.30)  | -0.22 (-0.75, 0.31)  |
| $\nu_2$    | 0.14 (-0.38, 0.68)   | 0.22 (-0.30, 0.75)   | 0.21 (-0.28, 0.75)   |
| $\nu_3$    | 0.04 (-0.40, 0.50)   | 0.04 (-0.38, 0.45)   | 0.05 (-0.40, 0.49)   |
| $\nu_4$    | -0.22 (-0.68, 0.16)  | -0.18 (-0.61, 0.22)  | -0.17 (-0.61, 0.22)  |
| $\nu_5$    | -0.05 (-0.53, 0.45)  | 0.09 (-0.40, 0.62)   | 0.09 (-0.39, 0.61)   |
| $\nu_6$    | -0.46 (-1.00, 0.01)  | -0.31 (-0.86, 0.16)  | -0.31 (-0.89, 0.16)  |
| $\nu_7$    | 0.04 (-0.42, 0.54)   | 0.08 (-0.34, 0.53)   | 0.08 (-0.35, 0.57)   |
| $\nu_8$    | -0.04 (-0.38, 0.31)  | 0.12 (-0.26, 0.56)   | 0.13 (-0.26, 0.54)   |
| $\nu_9$    | -0.13 (-0.68, 0.40)  | -0.24 (-0.83, 0.29)  | -0.24 (-0.83, 0.29)  |
| $\nu_{10}$ | -0.02 (-0.61, 0.65)  | -0.01 (-0.63, 0.61)  | -0.01 (-0.62, 0.63)  |
| $\nu_{11}$ | 0.07 (-0.32, 0.47)   | 0.11 (-0.28, 0.50)   | 0.12 (-0.27, 0.52)   |
| $\nu_{12}$ | 0.14 (-0.34, 0.68)   | 0.09 (-0.41, 0.57)   | 0.08 (-0.40, 0.58)   |
| $\nu_{13}$ | 0.00 (-0.37, 0.37)   | -0.06 (-0.46, 0.30)  | -0.07 (-0.48, 0.32)  |
| $\nu_{14}$ | -0.09 (-0.48, 0.30)  | -0.14 (-0.52, 0.24)  | -0.14 (-0.54, 0.24)  |
| $\nu_{15}$ | -0.55 (-0.94, -0.20) | -0.45 (-0.84, -0.09) | -0.45 (-0.85, -0.07) |
| $\nu_{16}$ | -0.24 (-0.65, 0.16)  | -0.24 (-0.63, 0.13)  | -0.23 (-0.62, 0.16)  |
| $\nu_{17}$ | 0.14 (-0.33, 0.60)   | 0.07 (-0.37, 0.51)   | 0.08 (-0.42, 0.54)   |
| $\nu_{18}$ | 0.37 ( 0.00, 0.77)   | 0.39 ( 0.01, 0.79)   | 0.39 ( 0.02, 0.82)   |
| $\nu_{19}$ | 0.12 (-0.26, 0.47)   | -0.09 (-0.54, 0.35)  | -0.09 (-0.54, 0.36)  |
| $\nu_{20}$ | 0.64 ( 0.28, 1.02)   | 0.38 (-0.08, 0.88)   | 0.38 (-0.09, 0.88)   |
| $\nu_{21}$ | -0.14 (-0.65, 0.33)  | -0.09 (-0.57, 0.38)  | -0.07 (-0.57, 0.42)  |
| $\nu_{22}$ | -0.02 (-0.46, 0.42)  | -0.01 (-0.45, 0.41)  | -0.01 (-0.43, 0.42)  |
| $\nu_{23}$ | 0.47 ( 0.10, 0.89)   | 0.53 ( 0.18, 0.94)   | 0.54 ( 0.16, 0.98)   |
| $\nu_{24}$ | 0.13 (-0.29, 0.56)   | 0.16 (-0.27, 0.59)   | 0.17 (-0.25, 0.62)   |
| $\nu_{25}$ | -0.04 (-0.38, 0.30)  | -0.04 (-0.38, 0.28)  | -0.05 (-0.38, 0.30)  |
| $\nu_{26}$ | -0.21 (-0.57, 0.14)  | -0.24 (-0.61, 0.09)  | -0.24 (-0.61, 0.10)  |
| $\tau$     | 0.35 ( 0.23, 0.55)   | 0.33 ( 0.21, 0.53)   | 0.33 ( 0.21, 0.55)   |
| $\rho$     | 0.31 (-0.41, 0.82)   | 0.22 (-0.51, 0.80)   | 0.24 (-0.54, 0.81)   |
| $\beta^a$  |                      | -0.06 (-0.15, 0.02)  | -0.06 (-0.15, 0.02)  |
| $\beta^w$  |                      |                      | 0.00 (-0.02, 0.01)   |
